# Supplementary material for: Characterization of AlSBA-15 prepared by post-synthesis alumination with trimethylaluminium
Source: Royal Society of Chemistry journal article supplement (doi:10.1039/b008168j), 2001-01-01
Supplement: b008168j.doc [file b008168j.doc]

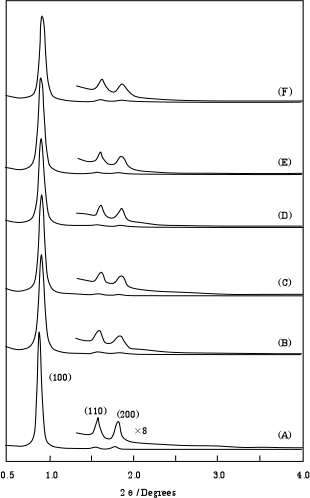


**Fig. S1** SAXS patterns of (A) parent SBA-15, (B) AlSBA-15 (TMA 1 mmol), (C) AlSBA-15 (TMA 2 mmol), (D) AlSBA-15 (TMA 3 mmol), (E) AlSBA-15 (TMA 4 mmol) and (F) AlSBA-15 (TMA 5 mmol).


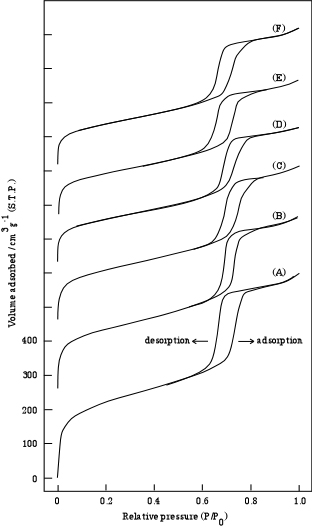


**Fig. S2** N2 adsorption-desorption isotherms at 77 K of (A) parent SBA-15, (B) AlSBA-15 (TMA 1 mmol), (C) AlSBA-15 (TMA 2 mmol), (D) AlSBA-15 (TMA 3 mmol), (E) AlSBA-15 (TMA 4 mmol) and (F) AlSBA-15 (TMA 5 mmol).
